# Supplementary material
Source: PubMed Central journal article supplement (PMC6545279)
Supplement: kwz040_petersen_web_material_final.pdf [file kwz040_petersen_web_material_final.pdf]

## Web Material

### One-Carbon Cofactor Intake and Risk of Neural Tube Defects Among Women Who Meet Folic Acid Recommendations: A Multicenter Case-Control Study

Julie M. Petersen, Samantha E. Parker, Krista S. Crider, Sarah C. Tinker, Allen A.  
Mitchell, and Martha M. Werler

#### WEB APPENDIX 1, PAGE 2

##### Table of Contents

|                                                                                                                                                                    |    |
|--------------------------------------------------------------------------------------------------------------------------------------------------------------------|----|
| Web Table 1. Distribution for and Correlations Between Periconceptional Intake of One-Carbon Cofactors From Diet <sup>a</sup> .....                                | 3  |
| Web Table 2. Distributions and Associations Between Individual Intakes of One-Carbon Cofactors and Neural Tube Defect and Spina Bifida Outcomes.....               | 4  |
| Web Table 3. Sources of One-Carbon Cofactor Intake from Diet and Supplements.....                                                                                  | 6  |
| Web Table 4. Comparison of Methodologies to Categorize One-Carbon Cofactor Intake .....                                                                            | 7  |
| Web Table 5. Distributions and Associations Between Concurrent Intakes of One-Carbon Cofactors and Neural Tube Defect and Spina Bifida Outcomes <sup>a</sup> ..... | 10 |
| Web Table 6. Models Adjusted for Estimated Total Folate Intake .....                                                                                               | 11 |
| Web Table 7. Models with Supplementers Excluded .....                                                                                                              | 12 |
| Web Figure 1. Spline Representing Association Between Dietary Vitamin B6 Intake and Neural Tube Defect Outcomes.....                                               | 13 |
| Web Figure 2. Flow of Inclusion in Study .....                                                                                                                     | 14 |
| Web Figure 3. Adjusted Associations Between Individual Intakes of One-Carbon Cofactors and Neural Tube Defect and Spina Bifida Outcomes.....                       | 15 |

## Web Appendix 1

### The One-Carbon Cycle

This description is provided to supplement Figure 1 in the main text. In brief, saturation of one of folate/folic acid's carbon-carbon double bonds results in dihydrofolate (DHF). Following, the addition of a hydrogen molecule leads to tetrahydrofolate (THF). Through the conversion of 5-methyl-THF to THF, homocysteine (Hcy) acquires a methyl group, resulting in methionine, a process mediated by S-adenosylmethionine (SAM); cobalamin (i.e., vitamin B12) is a cofactor of this pathway and interacts with the 5-methyltetrahydrofolate-homocysteine methyltransferase (MTR) gene. BHMT also converts homocysteine to methionine (in liver and kidney); betaine, which is oxidized from choline, is the methyl-donor for this reaction, and pyridoxine (vitamin B6) is a cofactor in the BHMT pathway.

### Categorization of One-Carbon Cofactor Intake

To categorize dietary intake (after adjustment for estimated total caloric intake), unadjusted cubic-restricted splines with three and five knots were used to identify cutoff values for each one-carbon cofactor. Cutoffs were identified where the crude odds ratio (OR) for neural tube defects (NTDs) between the intake categories of interest differed by at least 20%. The spline curve for dietary intake for dietary vitamin B6 is provided as an example (Web Figure 1). We explored the impact of total calorie adjustment by reconstructing the splines on values before energy adjustment and identified similar cutoffs.

**Web Table 1. Distribution for and Correlations Between Periconceptional Intake of One-Carbon Cofactors From Diet<sup>a</sup>**

| Average Daily Estimates <sup>b</sup> | Stat | B6 (mg) |        | B12 (µg) |        | Choline (mg) |        | Betaine (mg) |        | Methionine (g) |        | Folate (µg) |         | Total Calories |       |
|--------------------------------------|------|---------|--------|----------|--------|--------------|--------|--------------|--------|----------------|--------|-------------|---------|----------------|-------|
| <b>Central Tendency</b>              |      | Case    | Cont   | Case     | Cont   | Case         | Cont   | Case         | Cont   | Case           | Cont   | Case        | Cont    | Case           | Cont  |
| mean                                 |      | 1.82    | 1.88   | 4.36     | 4.26   | 272.9        | 275.0  | 84.7         | 80.1   | 1.60           | 1.63   | 373.4       | 384.2   | 1590           | 1536  |
| (SD)                                 |      | (0.42)  | (0.50) | (3.34)   | (3.25) | (67.3)       | (68.2) | (36.5)       | (33.8) | (0.36)         | (0.35) | (120.8)     | (123.2) | (570)          | (482) |
| median                               |      | 1.84    | 1.83   | 3.58     | 3.79   | 262.4        | 267.6  | 82.4         | 75.1   | 1.57           | 1.63   | 361.8       | 364.4   | 1473           | 1486  |
| (SD)                                 |      | (0.42)  | (0.53) | (2.08)   | (1.81) | (80.9)       | (75.7) | (46.9)       | (40.2) | (0.49)         | (0.45) | (162.3)     | (155.7) | (545)          | (609) |
| <b>Correlations</b>                  |      |         |        |          |        |              |        |              |        |                |        |             |         |                |       |
| B6 (mg)                              | r    | 1.00    |        | 0.33     |        | 0.28         |        | 0.08         |        | 0.23           |        | 0.62        |         | 0.00           |       |
| B12 (µg)                             | r    |         |        | 1.00     |        | 0.21         |        | 0.00         |        | 0.19           |        | 0.22        |         | 0.00           |       |
| Choline (mg)                         | r    |         |        |          |        | 1.00         |        | 0.11         |        | 0.65           |        | 0.04        |         | 0.00           |       |
| Betaine (mg)                         | r    |         |        |          |        |              |        | 1.00         |        | 0.05           |        | 0.26        |         | -0.02          |       |
| Methionine (g)                       | r    |         |        |          |        |              |        |              |        | 1.00           |        | -0.07       |         | -0.01          |       |
| Folate (µg)                          | r    |         |        |          |        |              |        |              |        |                |        | 1.00        |         | 0.03           |       |
| Total Calories                       | r    |         |        |          |        |              |        |              |        |                |        |             |         | 1.00           |       |

Case cases; Cont controls; iqr interquartile range; r Pearson Correlation Coefficient; SD standard deviation

<sup>a</sup> Data restricted to mothers reporting periconceptional folic acid intake  $\geq 400$  µg, Slone Birth Defects Study (1998-2015)

<sup>b</sup> Daily estimates shown above have been adjusted for total caloric intake.

**Web Table 2. Distributions and Associations Between Individual Intakes of One-Carbon Cofactors and Neural Tube Defect and Spina Bifida Outcomes<sup>a</sup>**

| One-Carbon Cofactor Comparison <sup>b</sup> | Cases (n exposed/ n Total) | Controls n Exposed/ n Total | Crude OR  | 95% CI | Adj. OR1 <sup>c</sup> | 95% CI | Adj. OR2 <sup>d</sup> | 95% CI |            |
|---------------------------------------------|----------------------------|-----------------------------|-----------|--------|-----------------------|--------|-----------------------|--------|------------|
| <b>Vitamin B6</b>                           |                            |                             |           |        |                       |        |                       |        |            |
| ≥2.2 mg vs < 2.2 mg                         | All NTDs                   | 98/164                      | 2008/2831 | 0.61   | 0.44, 0.84            | 0.76   | 0.54, 1.07            | 0.79   | 0.55, 1.14 |
|                                             | SB                         | 73/124                      |           | 0.59   | 0.41, 0.85            | 0.73   | 0.50, 1.08            | 0.77   | 0.51, 1.18 |
| <b>Vitamin B12</b>                          |                            |                             |           |        |                       |        |                       |        |            |
| ≥3 µg vs <3 µg                              | All NTDs                   | 140/164                     | 2548/2831 | 0.65   | 0.41, 1.02            | 0.76   | 0.47, 1.22            | 0.92   | 0.54, 1.55 |
|                                             | SB                         | 105/124                     |           | 0.61   | 0.37, 1.02            | 0.72   | 0.43, 1.22            | 0.87   | 0.48, 1.55 |
| <b>Choline</b>                              |                            |                             |           |        |                       |        |                       |        |            |
| ≥200 mg vs <200 mg                          | All NTDs                   | 143/164                     | 2562/2831 | 0.72   | 0.45, 1.15            | 0.73   | 0.44, 1.20            | 0.78   | 0.43, 1.40 |
|                                             | SB                         | 109/124                     |           | 0.76   | 0.44, 1.33            | 0.75   | 0.42, 1.32            | 0.74   | 0.38, 1.46 |
| <b>Methionine</b>                           |                            |                             |           |        |                       |        |                       |        |            |
| ≥1.3 g vs <1.3 g                            | All NTDs                   | 133/164                     | 2383/2831 | 0.81   | 0.54, 1.21            | 0.82   | 0.54, 1.25            | 0.95   | 0.57, 1.58 |
|                                             | SB                         | 103/124                     |           | 0.92   | 0.57, 1.49            | 0.91   | 0.55, 1.49            | 1.07   | 0.59, 1.94 |
| <b>Betaine</b>                              |                            |                             |           |        |                       |        |                       |        |            |
| 40 to <70 mg vs ≥70 mg                      | All NTDs                   | 47/152                      | 982/2610  | 0.74   | 0.52, 1.06            | 0.86   | 0.59, 1.24            | 0.86   | 0.59, 1.25 |
|                                             | SB                         | 33/115                      |           | 0.67   | 0.44, 1.01            | 0.73   | 0.48, 1.12            | 0.74   | 0.48, 1.13 |
| <40 mg vs ≥70 mg                            | All NTDs                   | 12/117                      | 221/1849  |        | nc                    |        | nc                    |        | nc         |
|                                             | SB                         | 9/91                        |           |        | nc                    |        | nc                    |        | nc         |

Adj. adjusted; CI confidence interval; nc not calculated; NTDs neural tube defects; OR odds ratio; SB spina bifida; vs versus

<sup>a</sup>Data are from the Slone Birth Defects Study (1998-2015), restricted to mothers with periconceptional folic acid ≥400 µg.

<sup>b</sup>Intake categorization based on intake from diet and supplementation; cutoff based on unadjusted restricted cubic splines.

<sup>c</sup>Adj. OR1 controls for maternal age, race, and study center; Adj. OR1 and 95% CI displayed in Web Figure 3.

<sup>d</sup>Adj. OR2 controls for maternal age, race, study center and the other FPC intake listed in the table.

**Web Table 3. Sources of One-Carbon Cofactor Intake from Diet and Supplements<sup>a</sup>**

| Micronutrient Group    | N    | N (%) meeting cutoff based on |                  |                 | Top 5 Sources                                                                                    |                                                                                                                             |
|------------------------|------|-------------------------------|------------------|-----------------|--------------------------------------------------------------------------------------------------|-----------------------------------------------------------------------------------------------------------------------------|
|                        |      | Diet only                     | Supplements only | Both            | Diet <sup>b</sup>                                                                                | Supplementation                                                                                                             |
| <b>Higher B6</b>       | 2106 | 272<br>(12.9%)                | 1519<br>(72.1%)  | 313<br>(14.9%)  | Cold Cereal<br>Dark / Wheat Bread<br>Rice / Pasta<br>Poultry<br>Eggs                             | Centrum Multivitamin<br>CVS Prenatal<br>Nature Made Prenatal<br>Flintstones Multivitamin<br>Maternal Prenatal               |
| <b>Higher B12</b>      | 2688 | 911<br>(33.9%)                | 497<br>(18.5%)   | 1279<br>(47.6%) | Liver<br>Milk<br>Cold Cereal<br>Cheese<br>Poultry                                                | Rainbow Light Prenatal<br>Flintstones Multi w/ Choline<br>VitaFusion Prenatal<br>Whole Foods Prenatal<br>Up and Up Prenatal |
| <b>Higher Choline</b>  | 2705 | 2476<br>(91.5%)               | 18<br>(0.7%)     | 211<br>(7.8%)   | Milk<br>Cold Cereal<br>Cheese<br>Poultry<br>Eggs                                                 | Rainbow Light Prenatal<br>Flintstones Multi w/ Choline<br>VitaFusion Prenatal<br>Whole Foods Prenatal<br>Up and Up Prenatal |
| <b>Middle Betaine</b>  | 1029 | 1029<br>(100.0%)              | n/a              | n/a             | Rice / Pasta<br>Potato Chips<br>French Fries<br>Cake<br>Mixed Dish (Lasagna,<br>Casserole, Stew) | n/a                                                                                                                         |
| <b>High Methionine</b> | 2516 | 2508<br>(99.7%)               | 2<br>(0.1%)      | 6<br>(0.2%)     | Cheese<br>Poultry<br>Eggs<br>Beef, pork, lamb<br>Fish                                            | Materna Prenatal (New)<br>Vita-Vim<br>Natural Factors Ultra Multi<br>Quest Prenatal<br>Opti-natal                           |
| <b>All 5</b>           | 622  | 65<br>(10.5%)                 | n/a              | n/a             | -                                                                                                | -                                                                                                                           |

n/a not applicable

<sup>a</sup>Data are from the Slone Epidemiology Center Birth Defects Study (years 1998-2015), restricted to mothers reporting and meeting the spline-based cutoffs for each one-carbon cofactor listed in the table.

<sup>b</sup>Among those meeting the cutoff based on dietary intake.

**Web Table 4. Comparison of Methodologies to Categorize One-Carbon Cofactor Intake<sup>a</sup>**

| Cofactor       | Modeling Method  | Periconceptual Supplementation <sup>b</sup> | Comparison for OR <sup>c</sup><br>(among non-supplementers) | Cases<br>(n=164) | Controls<br>(n=2831) | OR (95% CI)<br>unadjusted | OR (95% CI)<br>Adjusted <sup>d</sup> |
|----------------|------------------|---------------------------------------------|-------------------------------------------------------------|------------------|----------------------|---------------------------|--------------------------------------|
| <b>B6</b>      |                  | Unknown                                     |                                                             | 1                | 2                    | nc                        | nc                                   |
|                |                  | Any                                         |                                                             | 86               | 1746                 | 0.67 (0.40-1.10)          | 0.87 (0.51-1.47)                     |
|                | Quartiles        | None                                        | ≥2.19 mg (Q4)                                               | 12               | 271                  | 0.60 (0.29-1.25)          | 0.71 (0.33-1.52)                     |
|                |                  |                                             | <1.64 mg (Q1)                                               | 20               | 270                  | Ref                       | Ref                                  |
|                |                  | Any                                         |                                                             | 86               | 1746                 | 0.61 (0.44-0.85)          | 0.78 (0.55-1.11)                     |
|                | Spline           | None                                        | ≥2.2 mg                                                     | 11               | 261                  | 0.43 (0.18-1.00)          | 0.50 (0.21-1.19)                     |
|                |                  |                                             | <2.2 mg                                                     | 66               | 822                  | Ref                       | Ref                                  |
|                |                  | Any                                         |                                                             | 86               | 1746                 | 0.85 (0.30-2.38)          | 1.00 (0.35-2.89)                     |
|                | RDA <sup>e</sup> | None                                        | ≥1.3 mg                                                     | 73               | 1014                 | 1.24 (0.44-3.50)          | 1.20 (0.41-3.49)                     |
|                |                  |                                             | <1.3 mg                                                     | 4                | 69                   | Ref                       | Ref                                  |
| Continuous     | None             | 1-unit increase in SD                       | 77                                                          | 1083             | 0.67 (0.40-1.11)     | 0.74 (0.43-1.29)          |                                      |
| <b>B12</b>     |                  | Unknown                                     |                                                             | 0                | 1                    | nc                        | nc                                   |
|                |                  | Any                                         |                                                             | 87               | 1689                 | 0.61 (0.38-0.98)          | 0.77 (0.47-1.26)                     |
|                | Quartiles        | None                                        | ≥4.93 µg (Q4)                                               | 16               | 285                  | 0.67 (0.35-1.28)          | 0.68 (0.35-1.34)                     |
|                |                  |                                             | <3.00 µg (Q1)                                               | 24               | 285                  | Ref                       | Ref                                  |
|                |                  | Any                                         |                                                             | 87               | 1689                 | 0.61 (0.38-0.97)          | 0.76 (0.46-1.25)                     |
|                | Spline           | None                                        | ≥3 µg                                                       | 53               | 858                  | 0.73 (0.44-1.20)          | 0.76 (0.45-1.28)                     |
|                |                  |                                             | <3 µg                                                       | 24               | 283                  | Ref                       | Ref                                  |
|                |                  | Any                                         |                                                             | 87               | 1689                 | 0.54 (0.29-1.02)          | 0.63 (0.33-1.23)                     |
|                | RDA <sup>e</sup> | None                                        | ≥2.4 µg                                                     | 65               | 1015                 | 0.67 (0.35-1.28)          | 0.64 (0.33-1.25)                     |
|                |                  |                                             | <2.4 µg                                                     | 12               | 126                  | Ref                       | Ref                                  |
| Continuous     | None             | 1-unit increase in SD                       | 77                                                          | 1141             | 1.00 (0.93-1.06)     | 0.99 (0.93-1.05)          |                                      |
| <b>Choline</b> |                  | Unknown                                     |                                                             | 0                | 0                    | nc                        | nc                                   |
|                |                  | Any                                         |                                                             | 12               | 217                  | 0.95 (0.49-1.85)          | 1.11 (0.56-2.22)                     |
|                | Quartiles        | None                                        | ≥306.25 mg                                                  | 42               | 653                  | 1.11 (0.70-1.74)          | 1.20 (0.74-1.93)                     |

| Cofactor          | Modeling Method  | Periconceptional Supplementation <sup>b</sup> | Comparison for OR <sup>c</sup><br>(among non-supplementers) | Cases<br>(n=164) | Controls<br>(n=2831) | OR (95% CI)<br>unadjusted | OR (95% CI)<br>Adjusted <sup>d</sup> |
|-------------------|------------------|-----------------------------------------------|-------------------------------------------------------------|------------------|----------------------|---------------------------|--------------------------------------|
|                   |                  |                                               | <230.84 mg                                                  | 38               | 653                  | Ref                       | Ref                                  |
| Cofactor          | Modeling Method  | Periconceptional Supplementation <sup>a</sup> | Comparison for OR <sup>b</sup><br>(among non-supplementers) | Cases<br>(n=164) | Controls<br>(n=2831) | OR (95% CI)<br>unadjusted | OR (95% CI)<br>adjusted <sup>c</sup> |
| <b>Choline</b>    |                  | Any                                           |                                                             | 12               | 217                  | 0.71 (0.34-1.47)          | 0.80 (0.38-1.72)                     |
|                   | Spline           | None                                          | ≥200 mg                                                     | 131              | 2345                 | 0.72 (0.44-1.15)          | 0.72 (0.44-1.19)                     |
|                   |                  |                                               | <200 mg                                                     | 21               | 269                  | Ref                       | Ref                                  |
|                   | RDI <sup>e</sup> | None                                          | Any                                                         | 12               | 217                  | 0.95 (0.52-1.74)          | 1.07 (0.57-2.00)                     |
|                   |                  |                                               | ≥425 mg                                                     | 5                | 85                   | 1.01 (0.40-2.53)          | 0.95 (0.37-2.44)                     |
|                   |                  |                                               | <425 mg                                                     | 147              | 2529                 | Ref                       | Ref                                  |
|                   | Continuous       | None                                          | 1-unit increase in SD                                       | 152              | 2614                 | 1.00 (1.00-1.00)          | 1.00 (1.00-1.00)                     |
| <b>Betaine</b>    |                  | Unknown                                       |                                                             | 0                | 0                    | nc                        | nc                                   |
|                   |                  | Any                                           |                                                             | 1                | 24                   | nc                        | nc                                   |
|                   | Quartiles        | None                                          | ≥96.72 mg (Q4)                                              | 51               | 702                  | 1.24 (0.81-1.90)          | 1.06 (0.68-1.67)                     |
|                   |                  |                                               | <56.50 mg (Q1)                                              | 41               | 701                  | Ref                       | Ref                                  |
|                   | Spline           | None                                          | Any                                                         | 1                | 24                   | nc                        | nc                                   |
|                   |                  |                                               | ≥70 mg                                                      | 104              | 1604                 | Ref                       | Ref                                  |
| 40 to <70 mg      |                  |                                               | 47                                                          | 982              | 0.74 (0.52-1.05)     | 0.85 (0.59-1.24)          |                                      |
|                   |                  |                                               | < 40 mg                                                     | 12               | 221                  | 0.84 (0.45-1.55)          | 0.92 (0.48-1.74)                     |
|                   | Continuous       | None                                          | 1-unit increase in SD                                       | 163              | 2807                 | 1.00 (1.00-1.01)          | 1.00 (1.00-1.01)                     |
| <b>Methionine</b> |                  | Unknown                                       |                                                             | 0                | 0                    | nc                        | nc                                   |
|                   |                  | Any                                           |                                                             | 1                | 7                    | nc                        | nc                                   |
|                   | Quartiles        | None                                          | ≥1.85 g (Q4)                                                | 42               | 706                  | 0.96 (0.62-1.48)          | 1.15 (0.73-1.82)                     |
|                   |                  |                                               | <1.41 g (Q1)                                                | 44               | 706                  | Ref                       | Ref                                  |
|                   | Spline           | None                                          | Any                                                         | 1                | 7                    | nc                        | nc                                   |
|                   |                  |                                               | ≥1.3 g                                                      | 132              | 2376                 | 0.80 (0.54-1.20)          | 0.83 (0.54-1.26)                     |
|                   |                  |                                               | <1.3 g                                                      | 31               | 448                  | Ref                       | Ref                                  |
|                   | Continuous       | None                                          | 1-unit increase in SD                                       | 163              | 2824                 | 0.77 (0.49, 1.20)         | 0.93 (0.58-1.49)                     |



CI confidence interval; nc unable to calculate; NTD neural tube defect; OR odds ratio; Q1 quartile 1 (lowest); Q4 quartile 4 (highest); RDA recommended dietary allowance; RDI recommended dietary intake; Ref reference group; SD standard deviation

<sup>a</sup> Data are from the Slone Epidemiology Center Birth Defects Study (years 1998-2015), restricted to women with periconceptual folic acid  $\geq 400$   $\mu\text{g}$  daily.

<sup>b</sup>Supplementation categorization is only for the nutrient of interest (e.g., for B12, supplementation is defined as any reported use of a vitamin supplement containing B12 during the periconceptual period).

<sup>c</sup>Dietary intake adjusted for total caloric intake

<sup>d</sup>OR calculated using conventional (unconditional) logistic regression and adjusted for restricted sufficient set of covariates (i.e., study center, maternal race (white, black, Hispanic, other) and maternal age (<25, 25 to <35, 35+ years)).

<sup>e</sup>RDA and RDI based on 1998 IOM guidelines for non-pregnant adult females 19-50 years.

**Web Table 5. Distributions and Associations Between Concurrent Intakes of One-Carbon Cofactors and Neural Tube Defect and Spina Bifida Outcomes<sup>a</sup>**

|                                 | Number of Concurrent One-Carbon Cofactor Intakes <sup>b</sup> |                  |                  |                  |                  |
|---------------------------------|---------------------------------------------------------------|------------------|------------------|------------------|------------------|
|                                 | 0—1                                                           | 2                | 3                | 4                | 5                |
| <b>All NTDs<br/>(n=164)</b>     |                                                               |                  |                  |                  |                  |
| Cases/Controls                  | 11/101                                                        | 22/227           | 39/609           | 68/1284          | 24/598           |
| OR (95% CI)                     | Ref                                                           | 0.89 (0.42-1.90) | 0.59 (0.29-1.19) | 0.49 (0.25-0.95) | 0.37 (0.18-0.78) |
| aOR (95% CI) <sup>c</sup>       | Ref                                                           | 0.85 (0.39-1.89) | 0.64 (0.31-1.33) | 0.56 (0.28-1.13) | 0.49 (0.23-1.08) |
| <b>Spina Bifida<br/>(n=124)</b> |                                                               |                  |                  |                  |                  |
| Cases/Controls                  | 7/101                                                         | 17/227           | 33/609           | 50/1284          | 17/598           |
| OR (95% CI)                     | Ref                                                           | 1.08 (0.44-2.69) | 0.78 (0.34-1.82) | 0.56 (0.25-1.27) | 0.41 (0.17-1.01) |
| aOR (95% CI) <sup>c</sup>       | Ref                                                           | 1.03 (0.40-2.64) | 0.83 (0.35-1.97) | 0.62 (0.27-1.45) | 0.51 (0.20-1.32) |

aOR adjusted odds ratio; CI confidence interval; FFQ food frequency questionnaire; NTDs neural tube defects; OR crude odds ratio; Ref reference group

<sup>a</sup>Data are from the Slone Birth Defects Study (1998-2015), restricted to women with periconceptional folic acid  $\geq 400$   $\mu\text{g}$  daily.

<sup>b</sup>Intake categorization based on intake from diet (FFQ) and supplementation; cutoff based on unadjusted restricted cubic splines. Counts represent number of intakes within the respective primary comparison range for each one-carbon cofactor (B6  $\geq 2.2$  mg, B12  $\geq 3$   $\mu\text{g}$ , choline  $\geq 200$  mg, methionine  $\geq 1.3$  g, and betaine 40 to  $<70$  mg). n=12 in lowest intake group for betaine and reference intake for other one-carbon cofactors in a holdout group which is not reported above; this holdout group comprised controls only.

<sup>c</sup>aOR controls for maternal age, race, and study center (correspond with estimates plotted in Figure 2 in the main text).

**Web Table 6. Models Adjusted for Estimated Total Folate Intake<sup>a</sup>**

|                           | INDIVIDUAL INTAKE               |                  |                  |                  |                  |
|---------------------------|---------------------------------|------------------|------------------|------------------|------------------|
|                           | B6                              | B12              | Choline          | Methionine       | Betaine          |
| aOR (95% CI) <sup>b</sup> | 0.79 (0.56-1.13)                | 0.76 (0.54-1.08) | 0.73 (0.45-1.21) | 0.83 (0.55-1.27) | 0.84 (0.58-1.22) |
|                           | COUNTS OF INTAKE <sup>c,d</sup> |                  |                  |                  |                  |
|                           | 0-1                             | 2                | 3                | 4                | 5                |
| aOR (95% CI) <sup>b</sup> | Ref                             | 1.06 (0.42-2.73) | 0.86 (0.36-2.05) | 0.68 (0.29-1.59) | 0.55 (0.21-1.42) |

aOR adjusted odds ratio; CI confidence interval; NTDs neural tube defects; Ref reference group

<sup>a</sup>Adjusted models for individual and counts of concurrent index one-carbon cofactor intake and NTDs. Data are from the Slone Epidemiology Center Birth Defects Study (years 1998-2015), restricted to mothers reporting folic acid intake of  $\geq 400 \mu\text{g}$

<sup>b</sup>aORs control for maternal age, race, and study center, and estimated total daily folate (supplements + diet, natural discounted by 30%) during the periconceptional period.

<sup>c</sup>Counts represent number of intakes within the respective higher range for B6, B12, choline, and methionine, and middle intake for betaine

<sup>d</sup>n=12 (controls only) who had intake in the lower group for betaine and the other one-carbon cofactors served as a holdout group which is not reported above.

**Web Table 7. Models with Supplementers Excluded<sup>a</sup>**

|                                        | INDIVIDUAL INTAKE             |                  |                  |                  |                  |
|----------------------------------------|-------------------------------|------------------|------------------|------------------|------------------|
|                                        | B6                            | B12              | Choline          | Methionine       | Betaine          |
| Cases/Controls                         | 11/255                        | 53/795           | 65/942           | 60/862           | 17/327           |
| OR <sub>c</sub> (95% CI)               | 0.54 (0.28-1.04)              | 0.79 (0.47-1.32) | 0.78 (0.39-1.56) | 0.90 (0.50-1.61) | 0.63 (0.36-1.11) |
| aOR <sub>1</sub> (95% CI) <sup>b</sup> | 0.64 (0.33-1.26)              | 0.82 (0.48-1.41) | 0.83 (0.40-1.72) | 0.92 (0.54-1.25) | 0.64 (0.36-1.16) |
| aOR <sub>2</sub> (95% CI) <sup>c</sup> | 0.66 (0.33-1.30)              | 0.89 (0.50-1.60) | 0.76 (0.32-1.80) | 1.25 (0.59-2.63) | 0.66 (0.37-1.19) |
|                                        | COUNTS OF INTAKE <sup>d</sup> |                  |                  |                  |                  |
|                                        | 0-1                           | 2                | 3                | 4                | 5                |
| Cases/Controls                         | 11/101                        | 16/151           | 27/425           | 20/302           | 1/64             |
| OR (95% CI) <sup>b</sup>               | Ref                           | 0.97 (0.43-2.18) | 0.58 (0.28-1.22) | 0.61 (0.28-1.31) | nc               |
| aOR <sub>1</sub> (95% CI) <sup>c</sup> | Ref                           | 0.82 (0.35-1.92) | 0.61 (0.28-1.32) | 0.69 (0.31-1.56) | nc               |

aOR adjusted odds ratio; CI confidence interval; NTDs neural tube defects; OR crude odds ratio; Ref reference group  
<sup>a</sup>Crude and adjusted models for individual and counts of concurrent index one-carbon cofactor intake and NTDs. Data are from the Slone Epidemiology Center Birth Defects Study (years 1998-2015), restricted to mothers reporting folic acid intake of  $\geq 400 \mu\text{g}$  and who did not report any periconceptional supplementation (n=75 cases, n=1055 controls).

<sup>b</sup>aOR<sub>1</sub> controls for maternal age, race, and study center

<sup>c</sup>aOR<sub>2</sub> additionally controls for intake of the other one-carbon cofactors listed in the table.

<sup>d</sup>Counts represent number of intakes within the respective higher range for B6, B12, choline, and methionine, and middle intake for betaine. n=12 (controls only) who had intake in the lower group for betaine and the other one-carbon cofactors served as a holdout group which is not reported above.

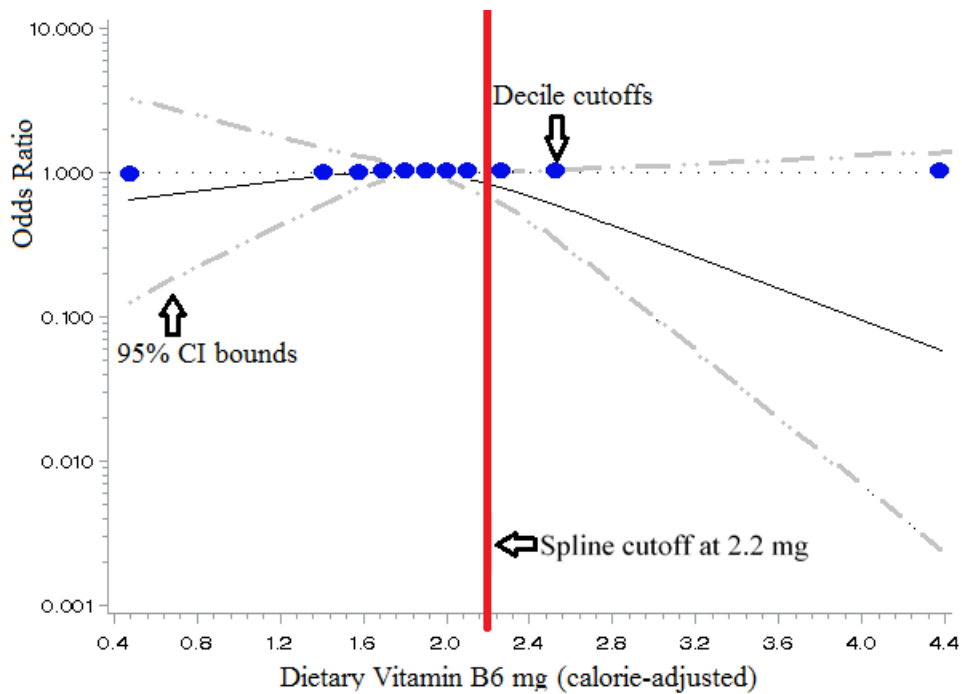

**Web Figure 1. Spline Representing Association Between Dietary Vitamin B6 Intake and Neural Tube Defect**

**Outcomes**

Data are from the Slone Epidemiology Center Birth Defects Study (1998-2015), restricted to mothers reporting periconceptional folic acid  $\geq 400 \mu\text{g}$  and no periconceptional B6 supplementation. Figure displays restricted, cubic spline regression model with 3 knots.

Daily vitamin B6 intake from diet was estimated from food frequency questionnaire data using nutrient matrices and has been adjusted for estimated total caloric intake.

CI confidence interval

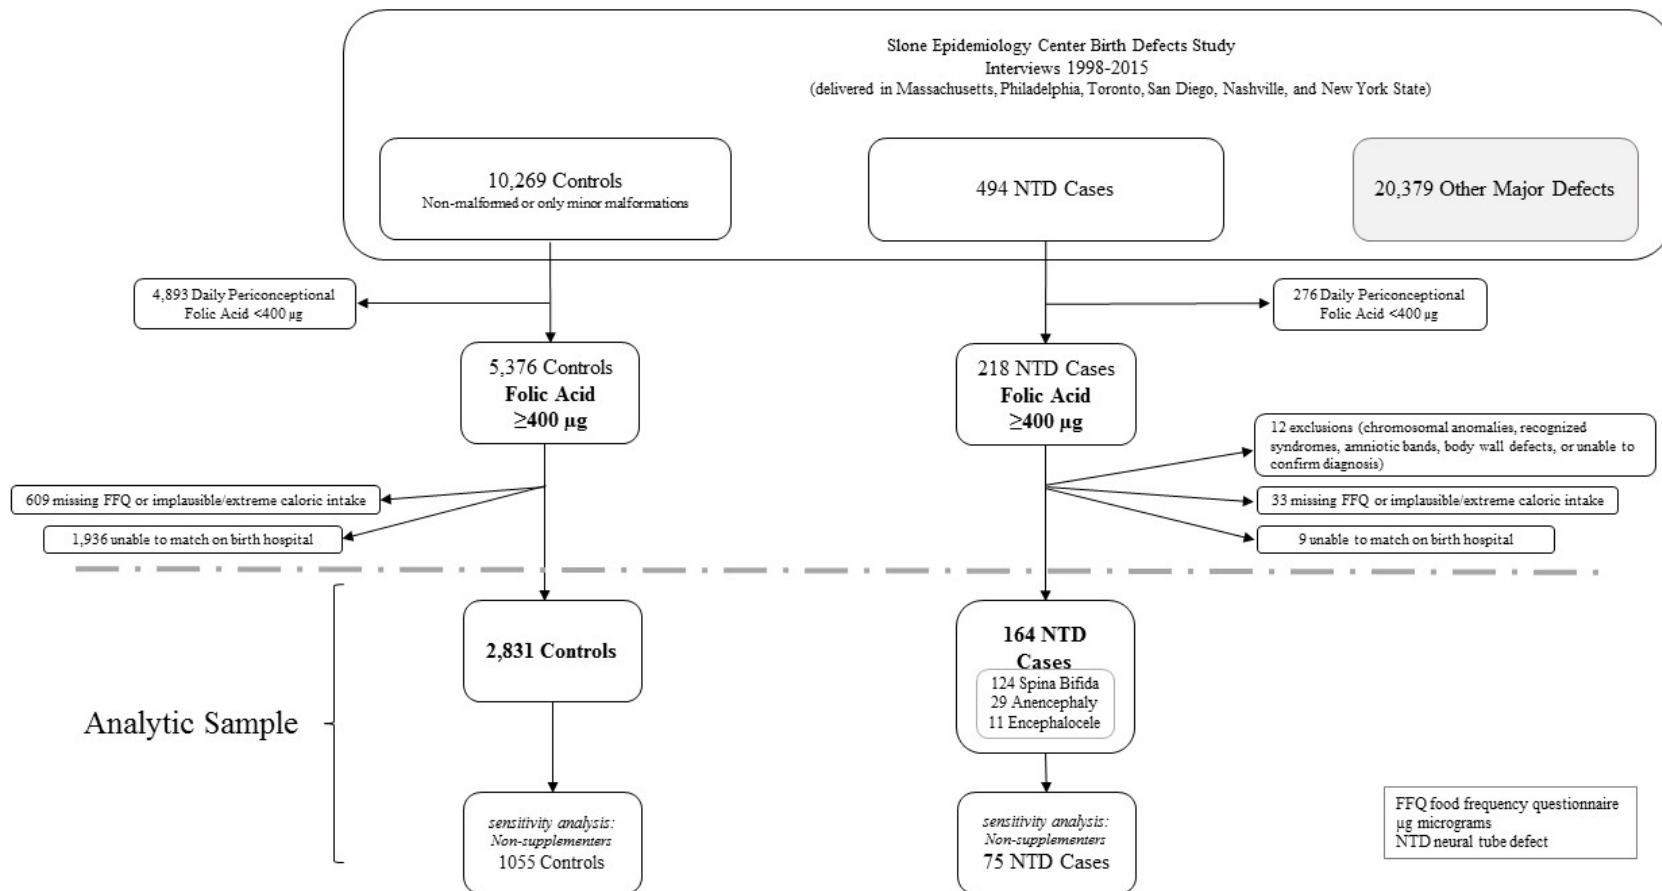

**Web Figure 2. Flow of Inclusion in Study of One-Carbon Cofactors and Neural Tube Defect Risk**

Data are from the Slone Epidemiology Center Birth Defects Study (1998-2015). Sensitivity analysis restricted to women who did not report periconceptional supplementation of vitamins B6, vitamin B12, choline, betaine, or methionine.

FFQ food frequency questionnaire; NTD neural tube defect

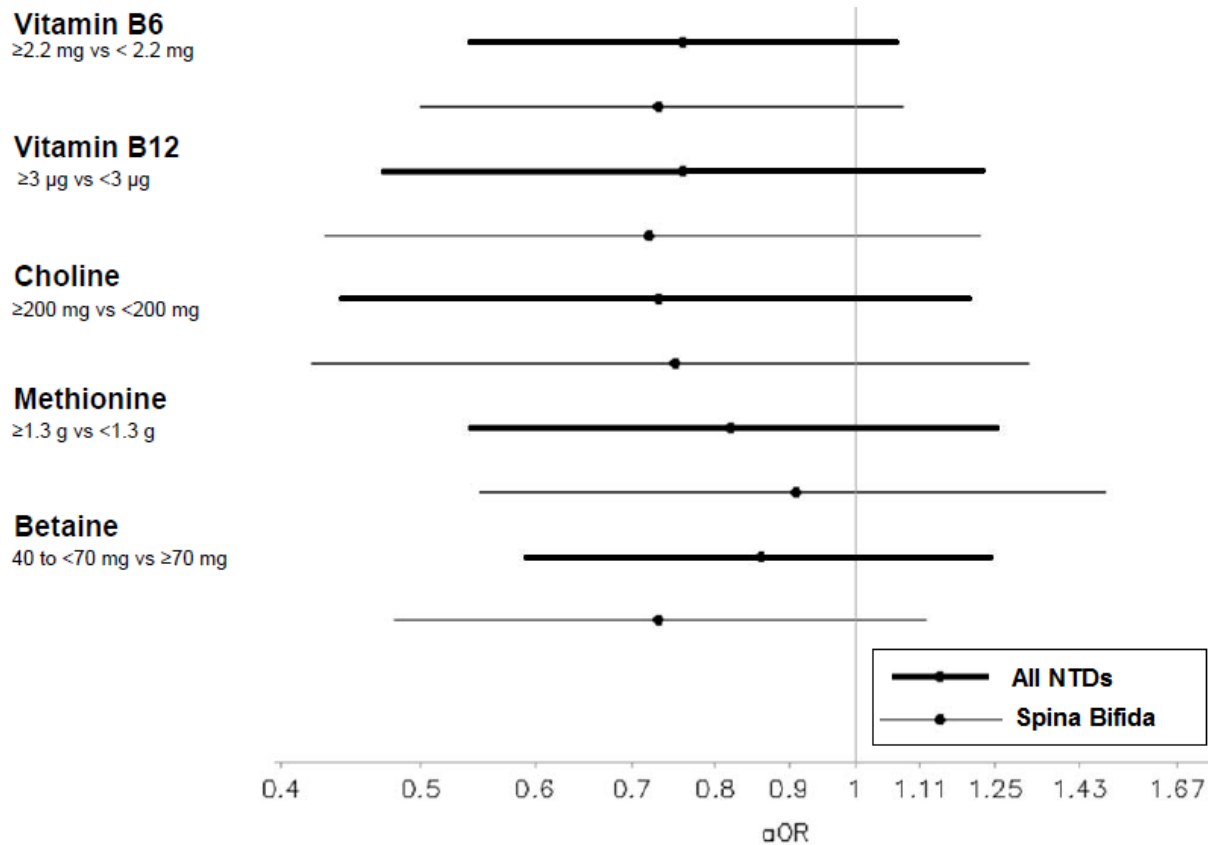

**Web Figure 3. Adjusted Associations Between Individual Intakes of One-Carbon Cofactors and Neural Tube Defect and Spina Bifida Outcomes**

Figure shows adjusted odds ratios control for maternal age, race, and study center; the dots represent the odds ratio point estimates and the whiskers represent the values within each 95% confidence interval. The numbers for these effect estimates are provided in Web Table 2.

aOR adjusted odds ratios; NTDs neural tube defects
